# Supplementary material for: Influence of gold nanoparticles applied to catalytic hydrogenation of acetophenone with cationic complexes containing ruthenium
Source: Royal Society of Chemistry journal article supplement (doi:10.1039/c6ra05616d), 2016-01-01
Supplement: c6ra05616d1.pdf [file c6ra05616d1.pdf]

## Electronic Supplementary Information.

Table 1. Crystal data and structure refinement of the complexes *cis*-[RuCl<sub>2</sub>(dppe)(bipy)], *cis*-[RuCl<sub>2</sub>(dppp)(bipy)] and *cis*-[RuCl(CH<sub>3</sub>OH)(dppb)(bipy)](PF<sub>6</sub>).

|                                                  | <i>cis</i> -[RuCl <sub>2</sub> (dppe)(bipy)]                                     | <i>cis</i> -[RuCl <sub>2</sub> (dppp)(bipy)]                                                  | <i>cis</i> [RuCl(CH <sub>3</sub> OH)(dppb)(bipy)](PF <sub>6</sub> )                                                    |
|--------------------------------------------------|----------------------------------------------------------------------------------|-----------------------------------------------------------------------------------------------|------------------------------------------------------------------------------------------------------------------------|
| Empirical formula                                | C <sub>36</sub> H <sub>32</sub> Cl <sub>2</sub> N <sub>2</sub> P <sub>2</sub> Ru | C <sub>74</sub> H <sub>68</sub> Cl <sub>4</sub> N <sub>4</sub> P <sub>4</sub> Ru <sub>2</sub> | [RuC <sub>39</sub> H <sub>40</sub> ON <sub>2</sub> ClP <sub>2</sub> ] <sub>2</sub> PF <sub>6</sub> ·CH <sub>3</sub> OH |
| Formula weight                                   | 726.55                                                                           | 1481.14                                                                                       | 928.20                                                                                                                 |
| Crystal system                                   | Monoclinic                                                                       | Monoclinic                                                                                    | Orthorhombic                                                                                                           |
| Space group                                      | P2 <sub>1</sub> /c                                                               | P2 <sub>1</sub> /c                                                                            | Pbca                                                                                                                   |
| Unit cell dimensions                             |                                                                                  |                                                                                               |                                                                                                                        |
| <i>a</i> (Å)                                     | 10.1088(3)                                                                       | 10.8260(1)                                                                                    | 18.8352(11)                                                                                                            |
| <i>b</i> (Å)                                     | 28.6127(9)                                                                       | 30.221(2)                                                                                     | 19.9178(7)                                                                                                             |
| <i>c</i> (Å)                                     | 11.8642(2)                                                                       | 21.141(2)                                                                                     | 21.3951(6)                                                                                                             |
| $\alpha$ (°)                                     |                                                                                  |                                                                                               | 90                                                                                                                     |
| $\beta$ (°)                                      | 110.620(2)°                                                                      | 94.401(4)°                                                                                    | 103.876(5)                                                                                                             |
| $\gamma$ (°)                                     |                                                                                  |                                                                                               | 90                                                                                                                     |
| <i>V</i> (Å <sup>3</sup> )                       | 3211.76(15)                                                                      | 6896.4(10)                                                                                    | 4307(3)                                                                                                                |
| <i>Z</i>                                         | 4                                                                                | 4                                                                                             | 4                                                                                                                      |
| Density (calculated) (Mg/m <sup>3</sup> )        | 1.503                                                                            | 1.427                                                                                         | 1.396                                                                                                                  |
| Absorption coefficient (mm <sup>-1</sup> )       | 0.783                                                                            | 0.731                                                                                         | 0.594                                                                                                                  |
| <i>F</i> (000)                                   | 1480                                                                             | 3024                                                                                          | 1840                                                                                                                   |
| Crystal size (mm <sup>3</sup> )                  | 0.47 x 0.31 x 0.05                                                               | 0.27 x 0.11 x 0.2                                                                             | 0.23 x 0.14 x 0.05                                                                                                     |
| Theta range for data collection                  | 3.13 to 26.03°                                                                   | 2.98 to 25.35°                                                                                | 2.92 to 26.39                                                                                                          |
| Index ranges                                     | -12 ≤ <i>h</i> ≤ 12<br>-35 ≤ <i>k</i> ≤ 35<br>-14 ≤ <i>l</i> ≤ 14                | -13 ≤ <i>h</i> ≤ 13<br>-34 ≤ <i>k</i> ≤ 36<br>-25 ≤ <i>l</i> ≤ 25                             | -13 ≤ <i>h</i> ≤ 13<br>-28 ≤ <i>k</i> ≤ 28<br>-22 ≤ <i>l</i> ≤ 22                                                      |
| Reflections collected                            | 29448                                                                            | 19731                                                                                         | 31481                                                                                                                  |
| Independent reflections                          | 6307 [R(int) = 0.0675]                                                           | 11986 [R(int) = 0.1309]                                                                       | 8787 [R(int) = 0.0639]                                                                                                 |
| Completeness to theta maximum (%)                | 99.3                                                                             | 94.8                                                                                          | 99.5                                                                                                                   |
| Max. and min. transmission                       | 0.966 and 0.771                                                                  | 0.985 and 0.876                                                                               | 0.975 and 0.896                                                                                                        |
| Refinement method                                | Full-matrix least-squares on F <sup>2</sup>                                      | Full-matrix least-squares on F <sup>2</sup>                                                   | Full-matrix least-squares on F <sup>2</sup>                                                                            |
| Data / restraints / parameters                   | 6307 / 0 / 388                                                                   | 11986 / 0 / 794                                                                               | 8787 / 0 / 488                                                                                                         |
| Goodness-of-fit on F <sup>2</sup>                | 1.025                                                                            | 1.008                                                                                         | 1.121                                                                                                                  |
| Final R indices [ <i>I</i> > 2σ( <i>I</i> )]     | R1 = 0.0410<br>wR2 = 0.0905                                                      | R1 = 0.0897<br>wR2 = 0.1495                                                                   | R1 = 0.0491<br>wR2 = 0.1243                                                                                            |
| R indices (all data)                             | R1 = 0.0711<br>wR2 = 0.1011                                                      | R1 = 0.2611<br>wR2 = 0.1937                                                                   | R1 = 0.0777<br>wR2 = 0.1333                                                                                            |
| Largest diff. peak and hole (e.Å <sup>-3</sup> ) | 0.444 and -0.336                                                                 | 0.815 and -0.431                                                                              | 0.400 and -0.539                                                                                                       |
